# Supplementary material for: Integration of Untargeted Metabolomics and Object-Oriented Data-Processing Protocols to Characterize Acerola Powder Composition as Functional Food Ingredient
Source: MDPI journal article supplement (doi:10.3390/antiox12071341), 2023-06-25
Supplement: s1 [file s1]

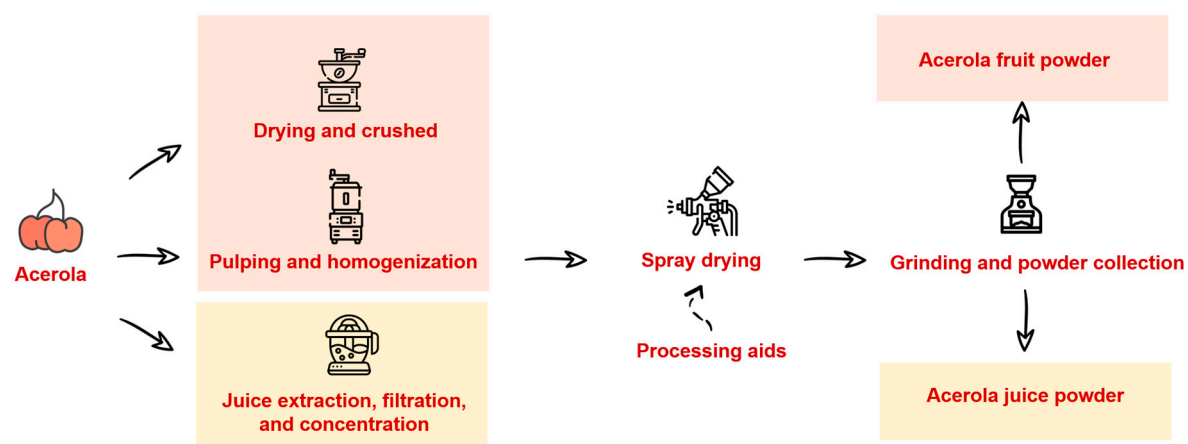

**Figure S1.** The processing of acerola juice powder and acerola fruit powder. The icons used in this figure are from [www.flaticon.com](http://www.flaticon.com).

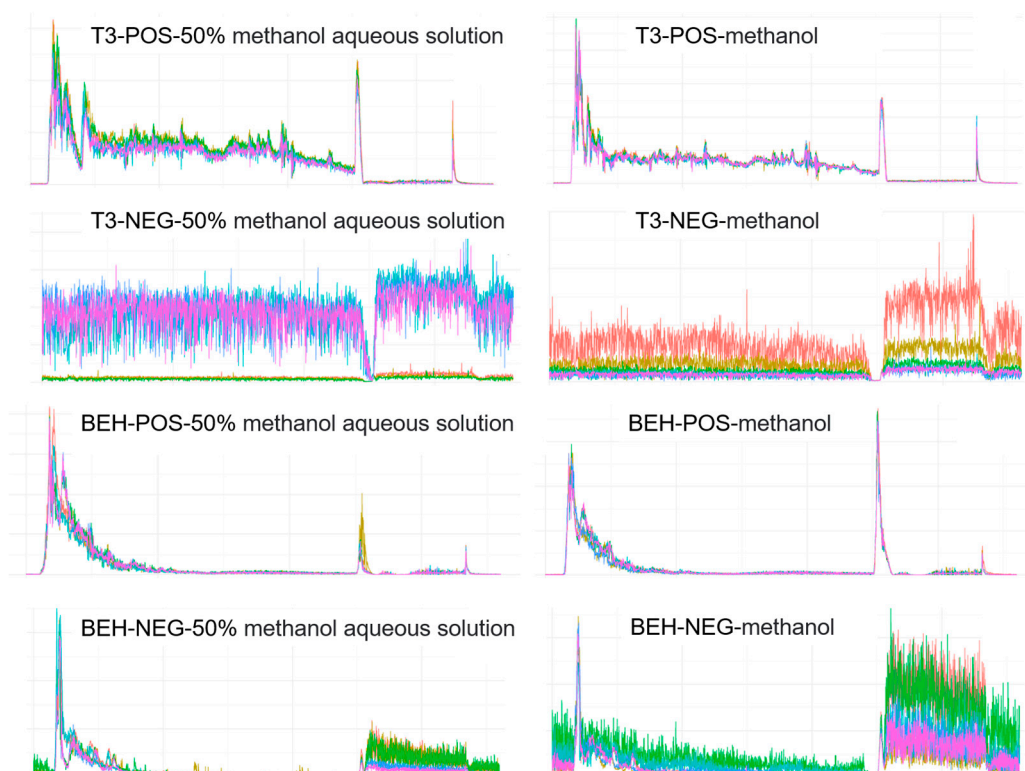

**Figure S2.** Total ion chromatograms of acerola powder samples extracted by different solvents and separated by different columns in positive and negative modes.

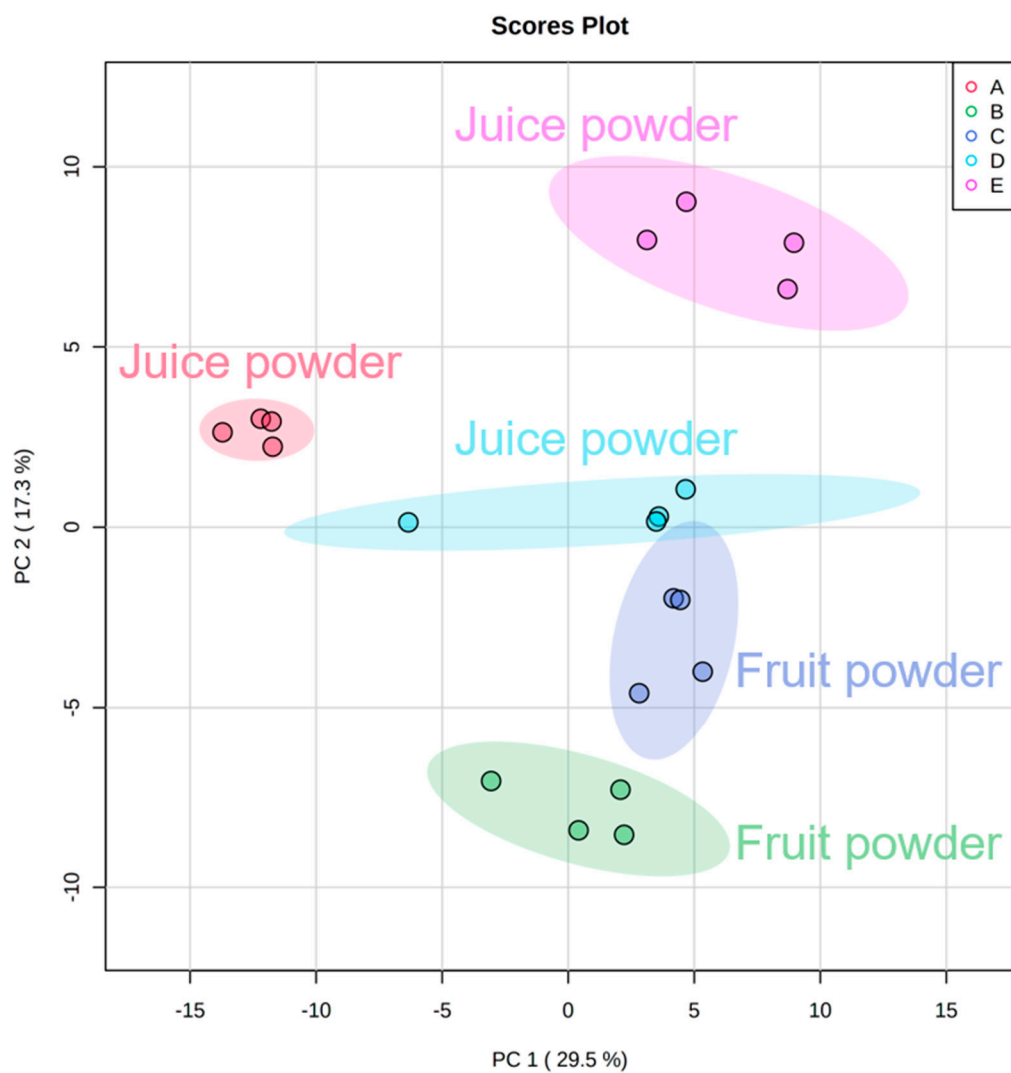

**Figure S3.** PCA score scatter plot of peak area response for the acerola powder samples from 5 factories. Data matrices for all samples were generated through the 175 identified compounds.
