# Supplementary material for: Integration of Untargeted Metabolomics and Object-Oriented Data-Processing Protocols to Characterize Acerola Powder Composition as Functional Food Ingredient
Source: Antioxidants (Basel). 2023 Jun 25;12(7):1341. doi: 10.3390/antiox12071341 (PMC10376614; doi:10.3390/antiox12071341)
Supplement: Supplementary file 1 [file antioxidants-12-01341-s001.zip › Table S1.xlsx]

## Sheet: Sheet1
Table S1. Type examination of acerola powder from 5 factories.
	A	B	C	D	E
pH (sol at 10%)	-	-	3.4±0.0	3.4±0.1	2.8±0.4
Moisture (%)	2.5±0.6	-	1.7±0.1	2.8±0.4	2.5±0.4
Ash content (%)	2.9±0.2	-	3.3±0.6	-	-
Vitamin C (%)	17.1±0.6	18.2±0.3	19.2±0.5	17.0±0.4	17.0±0.3
Lead content (mg/kg)	ND	ND	ND	-	-
Arsenic content (mg/kg)	ND	-	ND	-	-
Total plate count (CFU/g)	＜10	＜10	＜100	<10	<10
Molds and yeasts (CFU/g)	＜10	＜10	＜20	<10	<10
Coliform group (MPN/g)	＜0.30	＜0.30	＜0.36	<0.3	<0.3
Staphylococcus aureus	ND	-	ND	-	-
Salmonella	ND	ND	ND	-	-
ND, not dectected.
